# Supplementary figures and images for: Muscle function and homeostasis require cytokine inhibition of AKT activity in Drosophila
Source: eLife journal article supplement (doi:10.7554/elife.51595), 2020-01-16

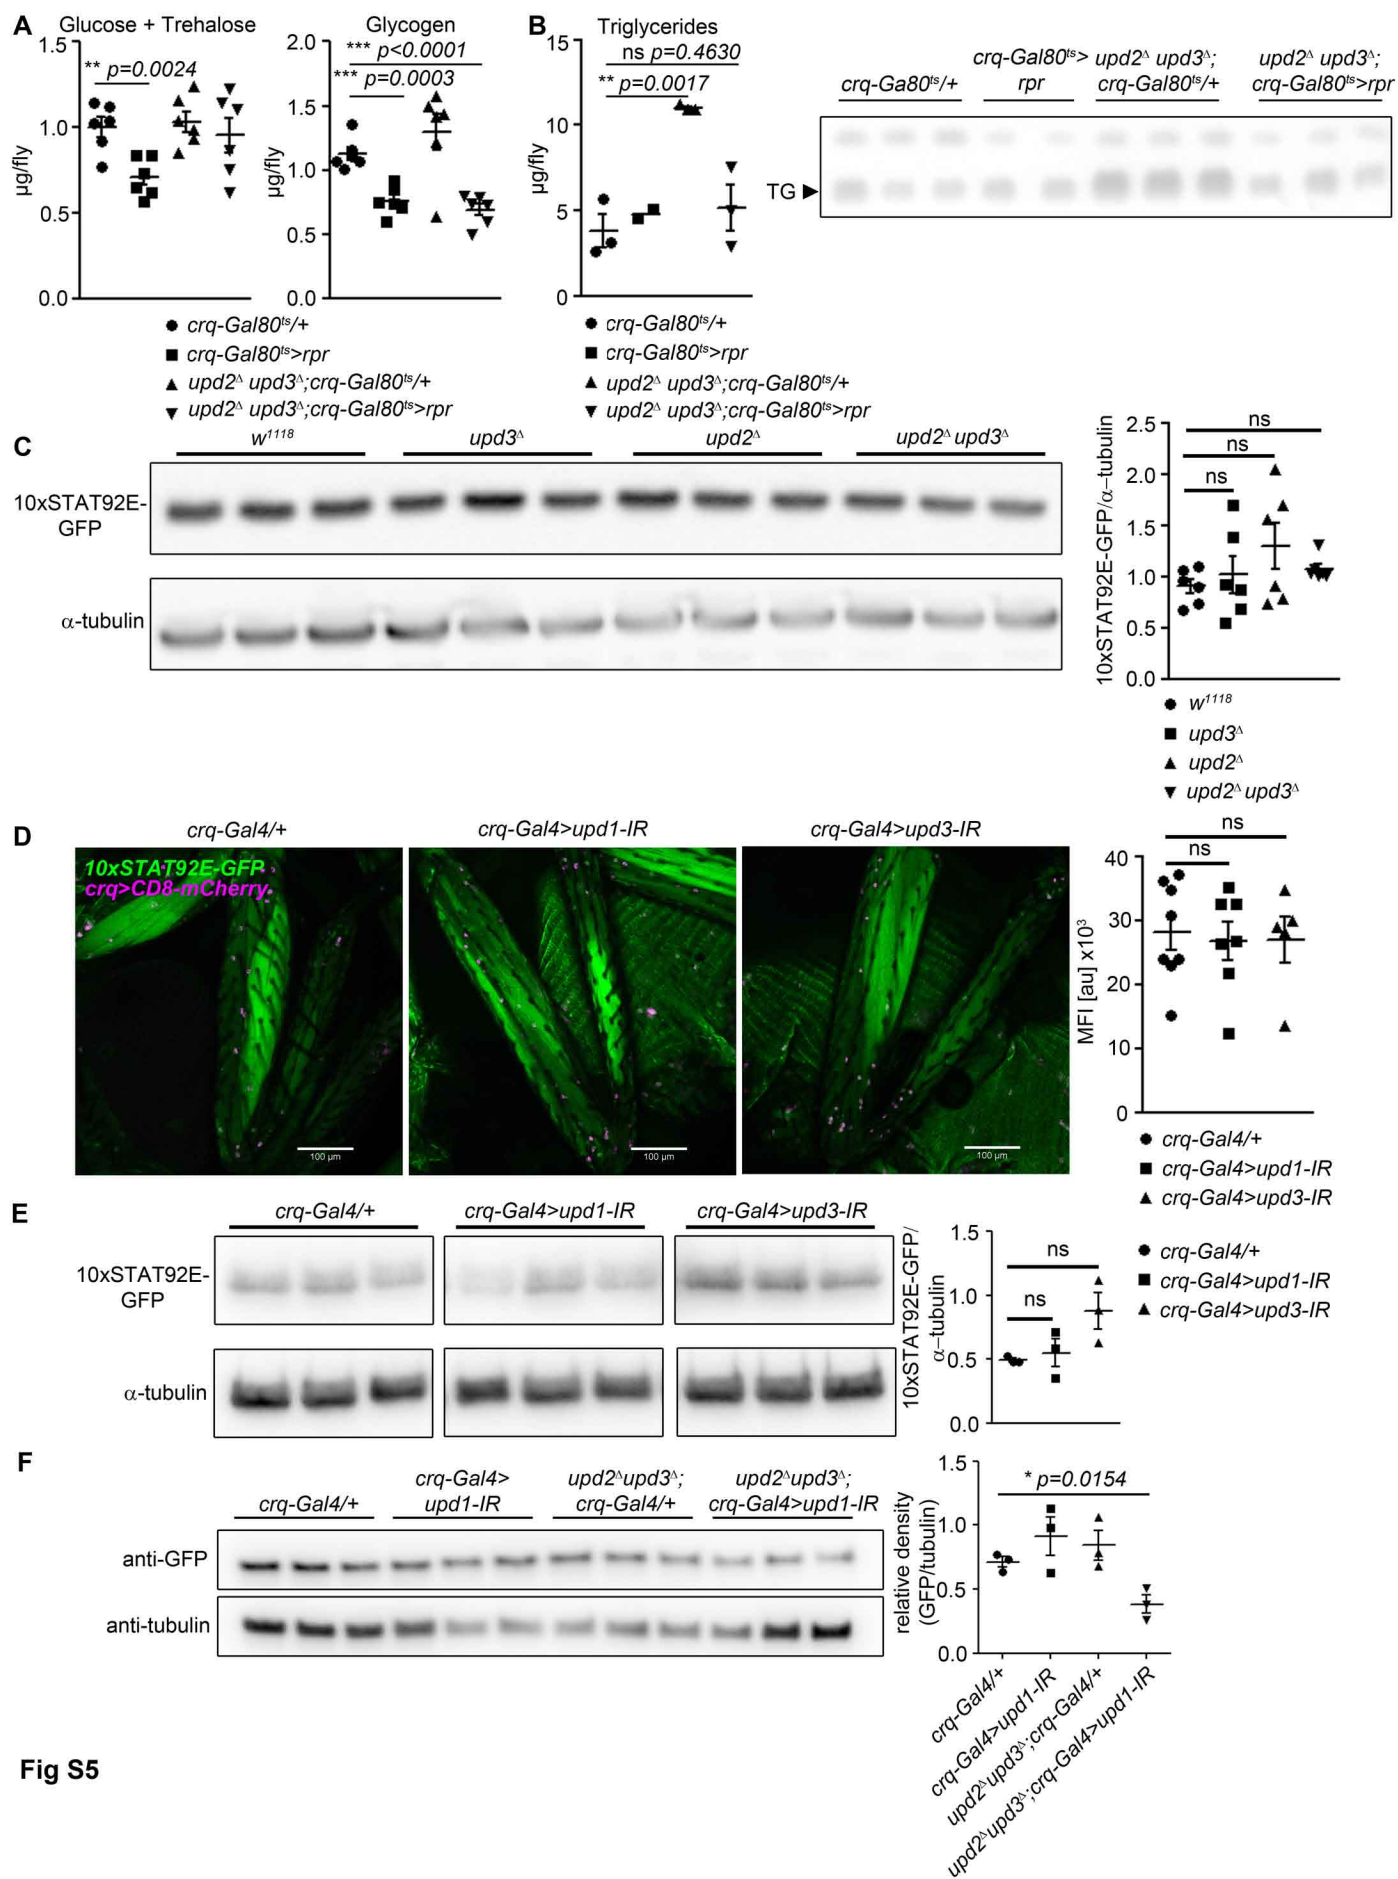

**Fig S5**

Supplement: supp [file elife-51595-supp-v1.zip]

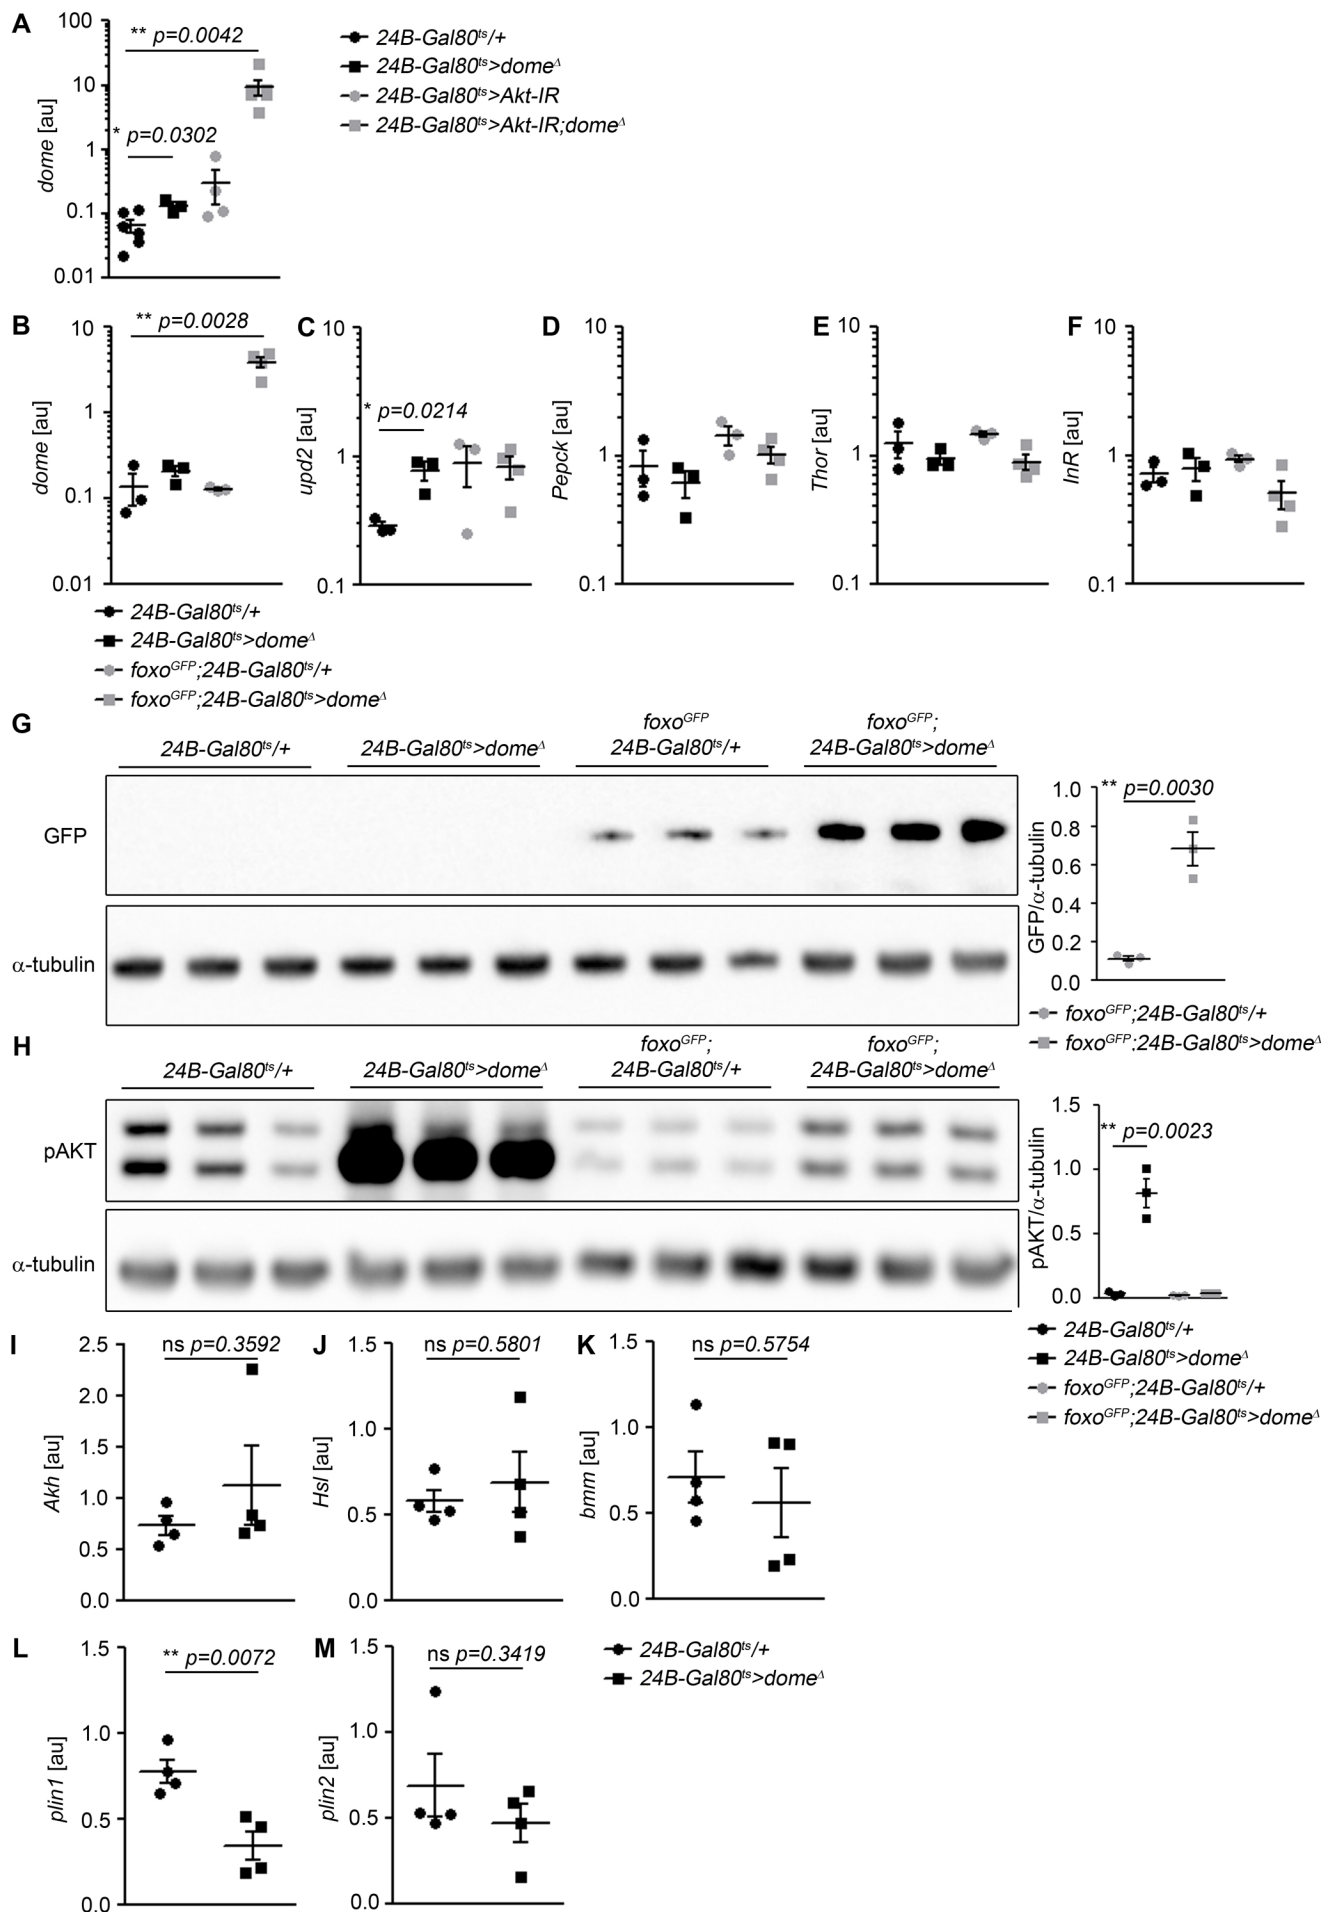

**Fig S3**

Supplement: supp [file elife-51595-supp-v1.zip]

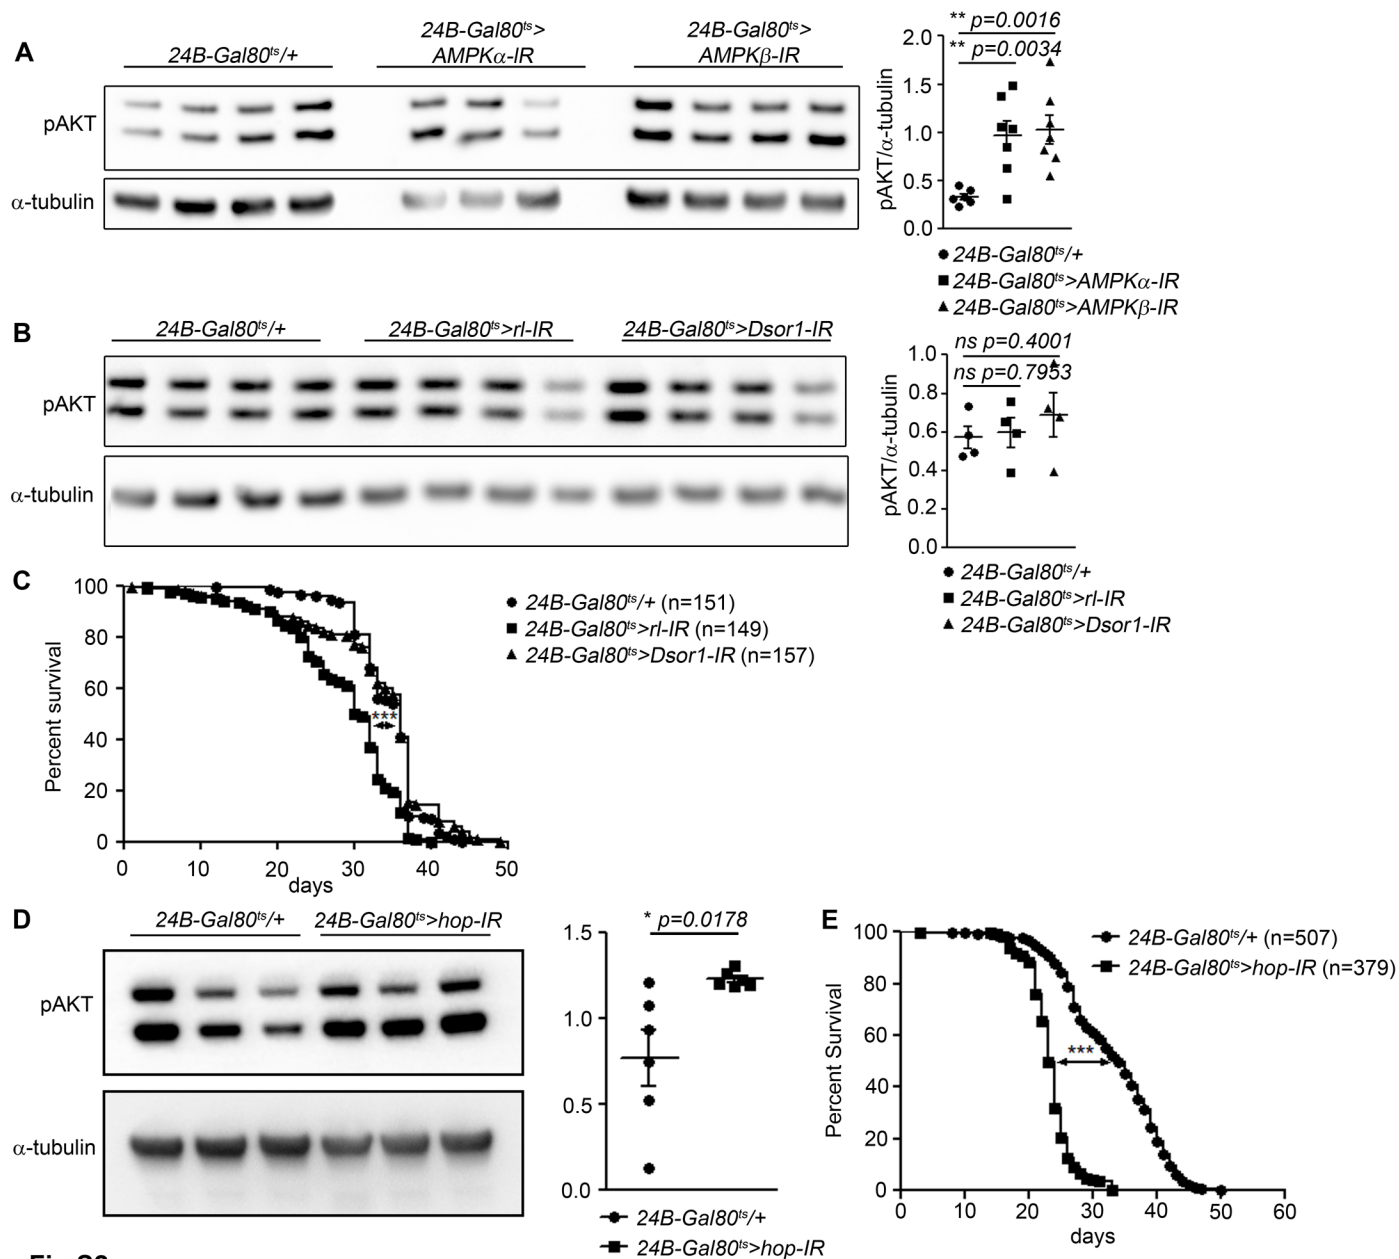

**Fig S2**

Supplement: supp [file elife-51595-supp-v1.zip]

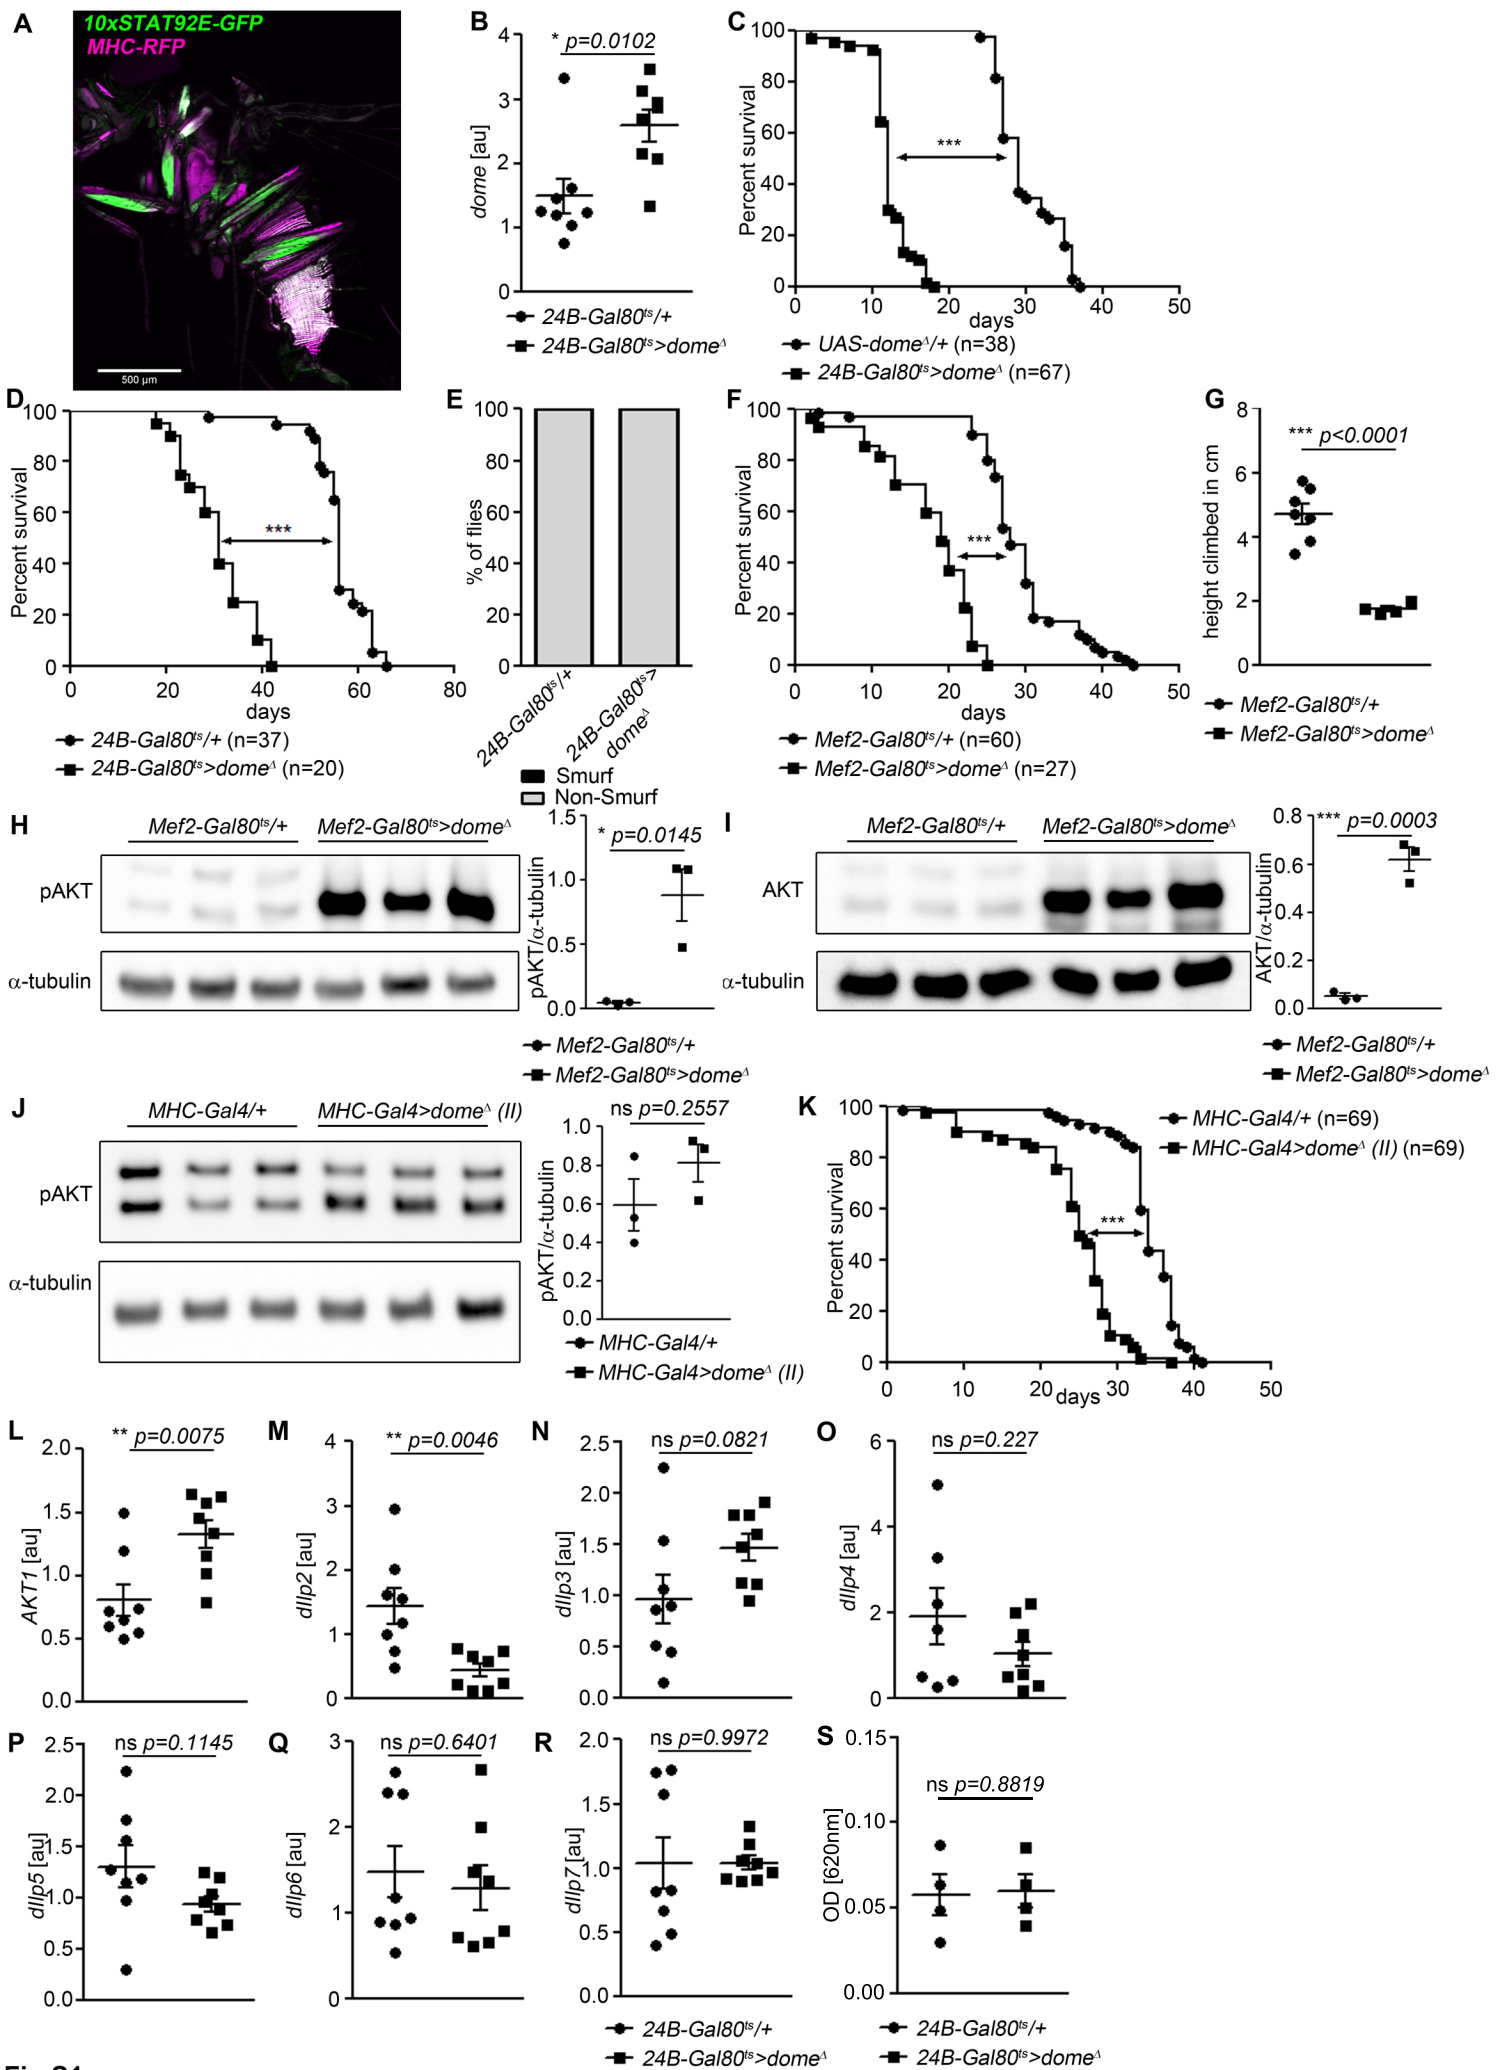

**Fig S1**

Supplement: supp [file elife-51595-supp-v1.zip]

*crq-Gal4/+*

*crq-Gal80<sup>ts</sup>>rpr*

**A**

24h at 29°C

24h at 29°C

48h at 29°C

48h at 29°C

72h at 29°C

72h at 29°C

**B**

*crq-Gal4/+*

*crq-Gal80<sup>ts</sup>>rpr*

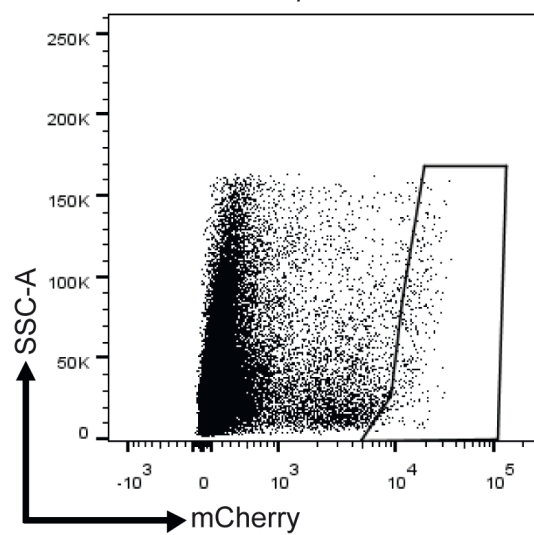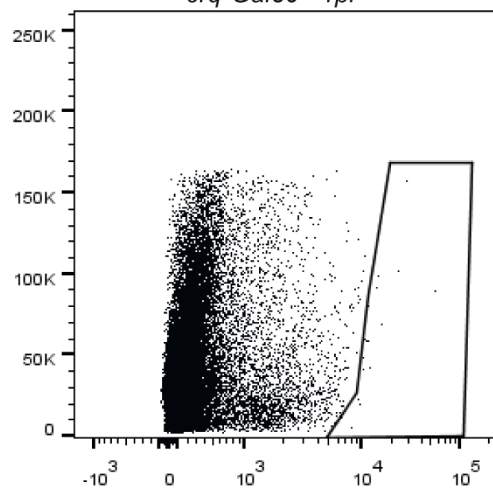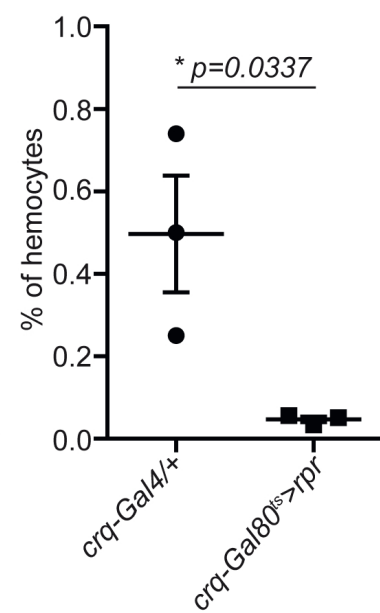

**C**

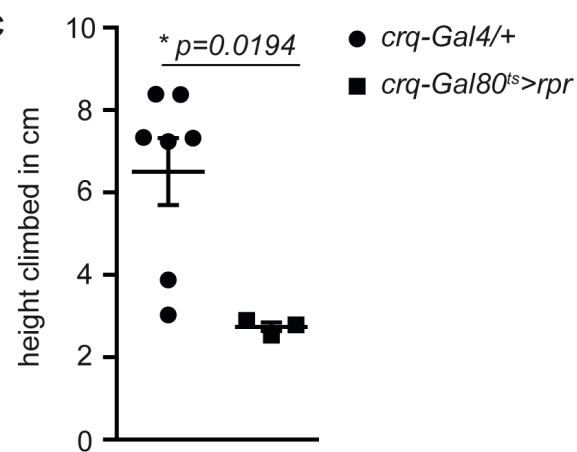

**Fig S4**

Supplement: supp [file elife-51595-supp-v1.zip]
